# Supplementary material
Source: PubMed Central journal article supplement (PMC6005117)
Supplement: djy064_supp.pdf [file djy064_supp.pdf]

Supplementary Figure 1

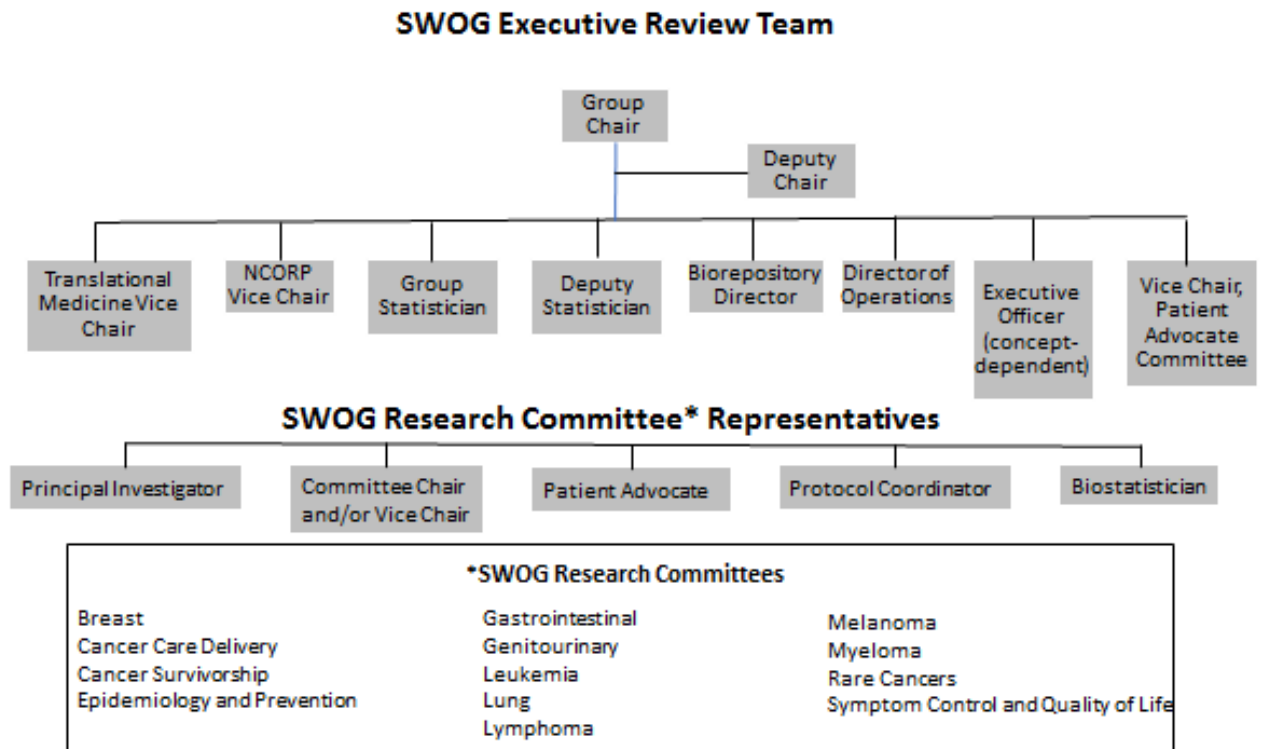

Concepts are presented to the SWOG Executive Review Team by representatives from SWOG Research Committees. The Principal Investigator takes the lead in presenting the concept, with support from the Patient Advocate and other members of the Research Committee.
